# Supplementary material for: A palladium-catalyzed oxidative cross-coupling reaction between aryl pinacol boronates and H-phosphonates in ethanol
Source: Royal Society of Chemistry journal article supplement (doi:10.1039/c7ra04619g), 2017-01-01

## Supplementary Information

### Palladium-Catalyzed Oxidative Cross-Coupling Reaction between Aryl Pinacol Boronates with *H*-Phosponates in Ethanol

Te-Hsuan Chen, Daggula Mallikarjuna Reddy, and Chin-Fa Lee\*

Department of Chemistry, National Chung Hsing University, Taichung, Taiwan 402, R.O.C.

E-mail: [cfalee@dragon.nchu.edu.tw](mailto:cfalee@dragon.nchu.edu.tw)

#### Table of Contents

|                                                 |   |
|-------------------------------------------------|---|
| 1. General information for NMR measurement..... | 2 |
| 2. NMR Spectra of Compounds.....                | 3 |

## **1. General information for NMR measurement**

Proton and carbon nuclear magnetic resonance spectra ( $^1\text{H}$  and  $^{13}\text{C}$  NMR) were recorded in  $\text{CDCl}_3$ . Chemical shifts ( $\delta$ ) are reported in parts per million (ppm), and coupling constants ( $J$ ) are reported in hertz (Hz).

## 2. NMR Spectra of Compounds

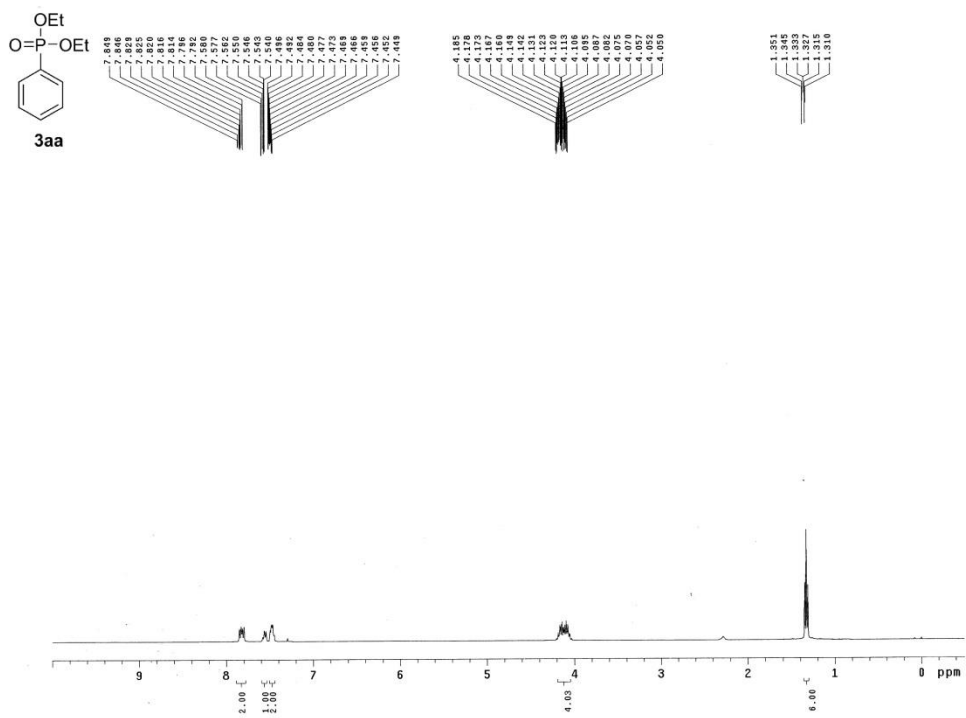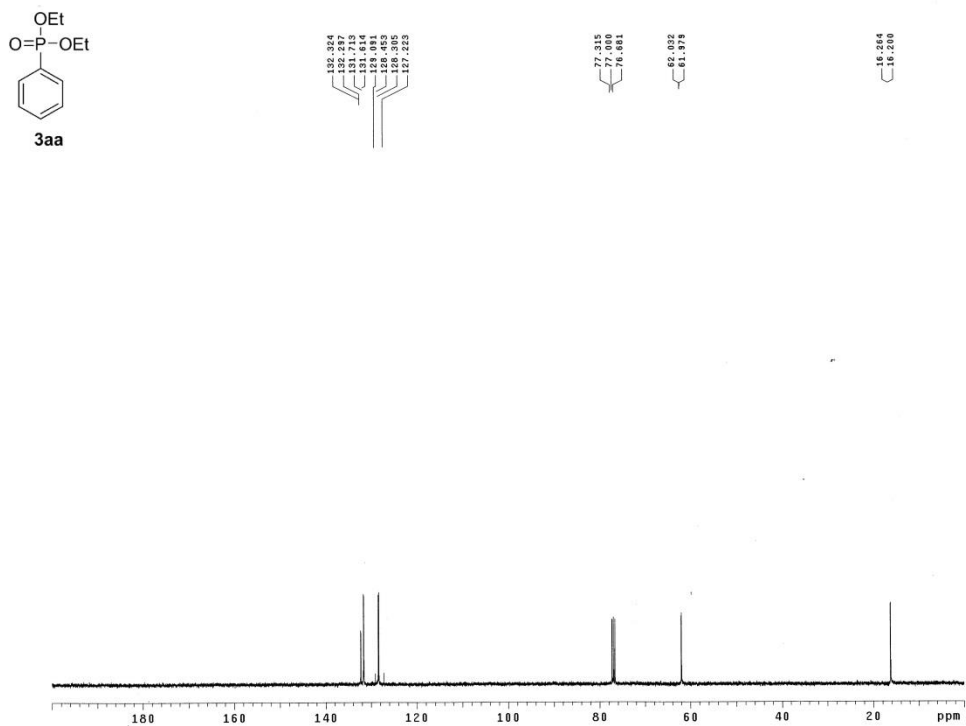

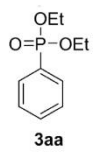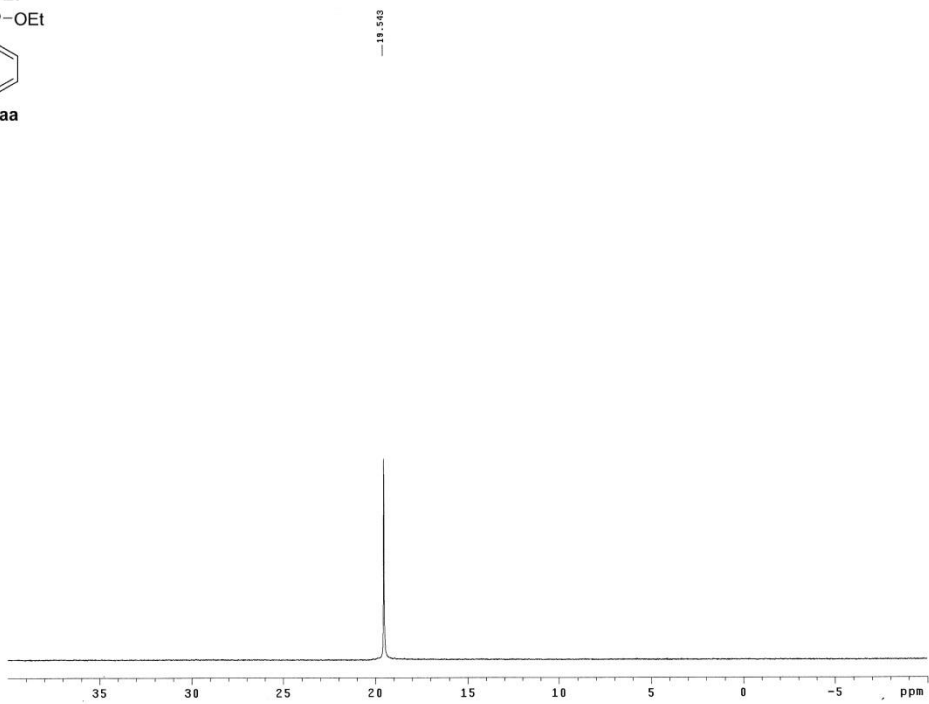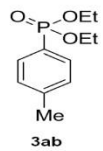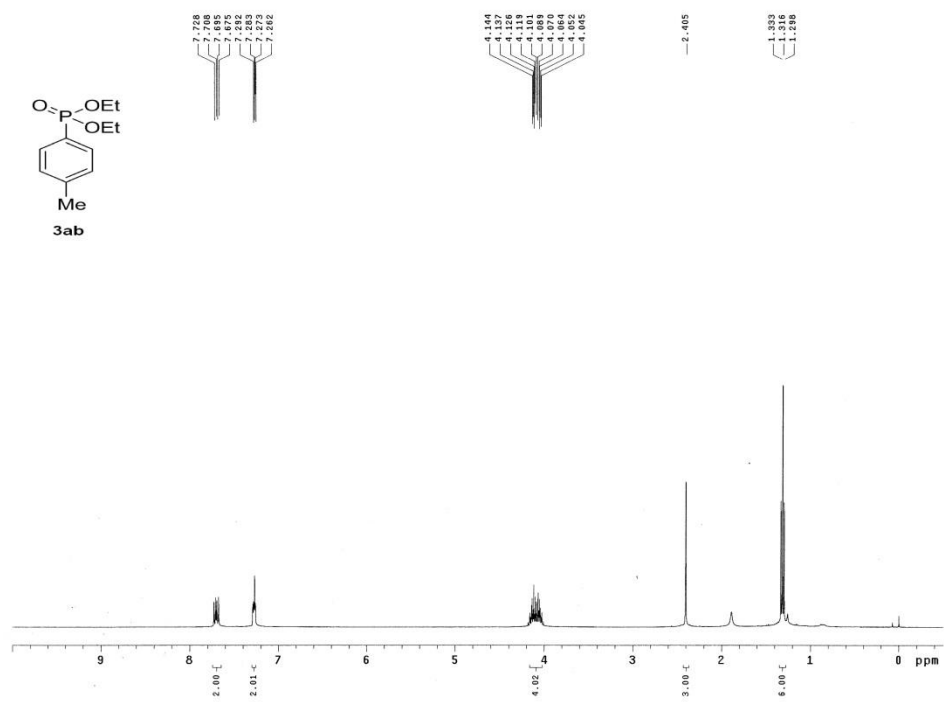

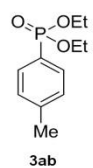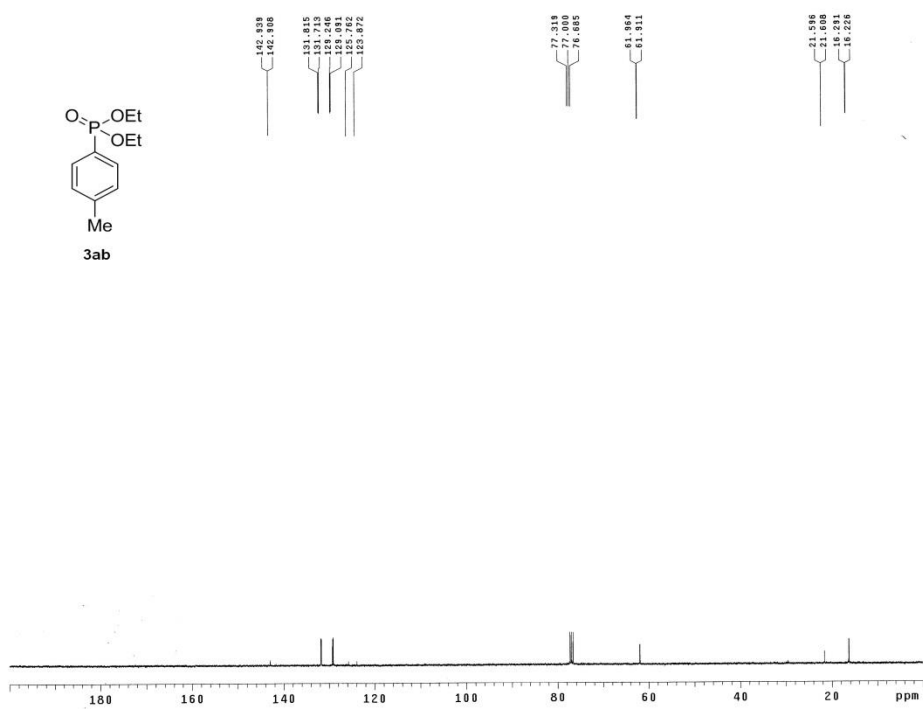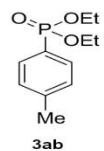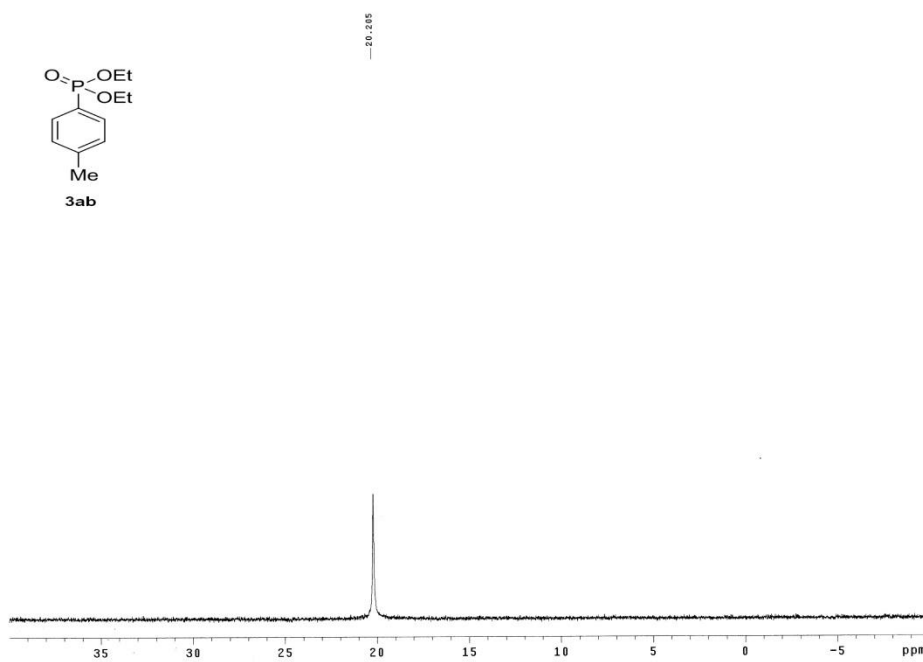

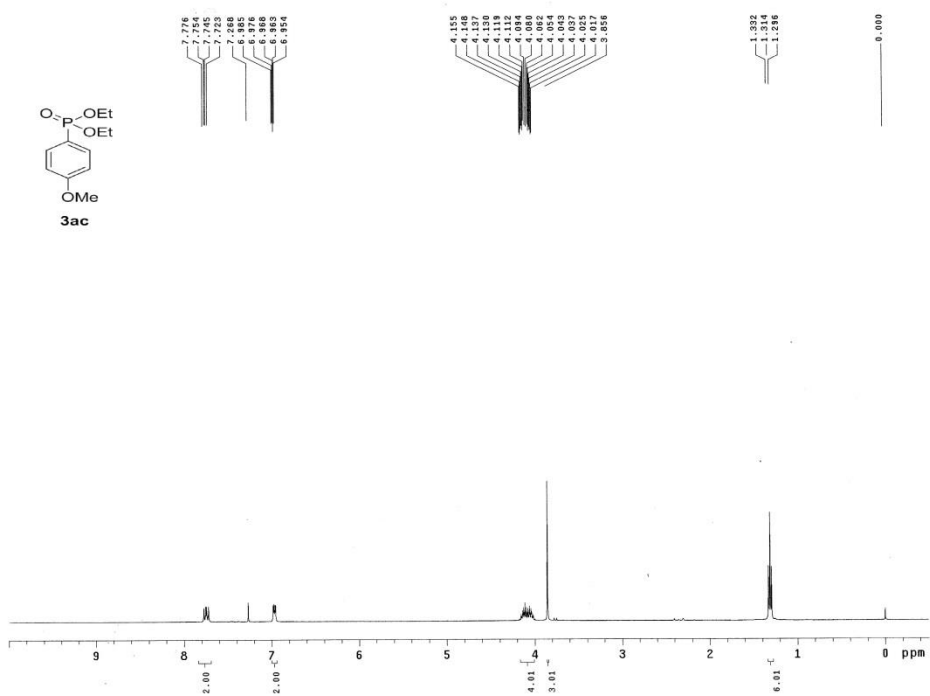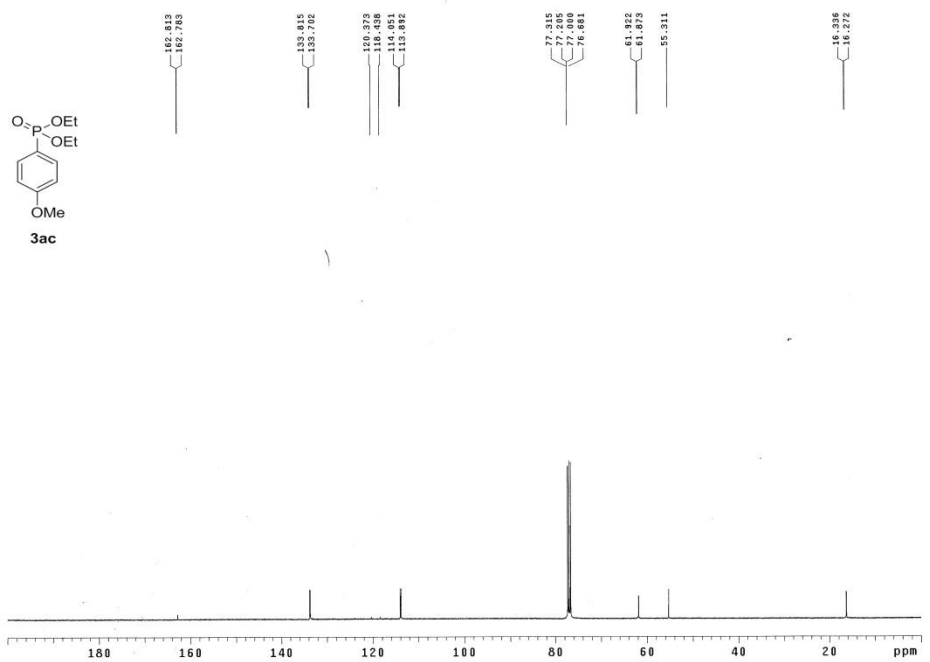

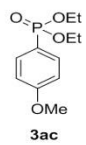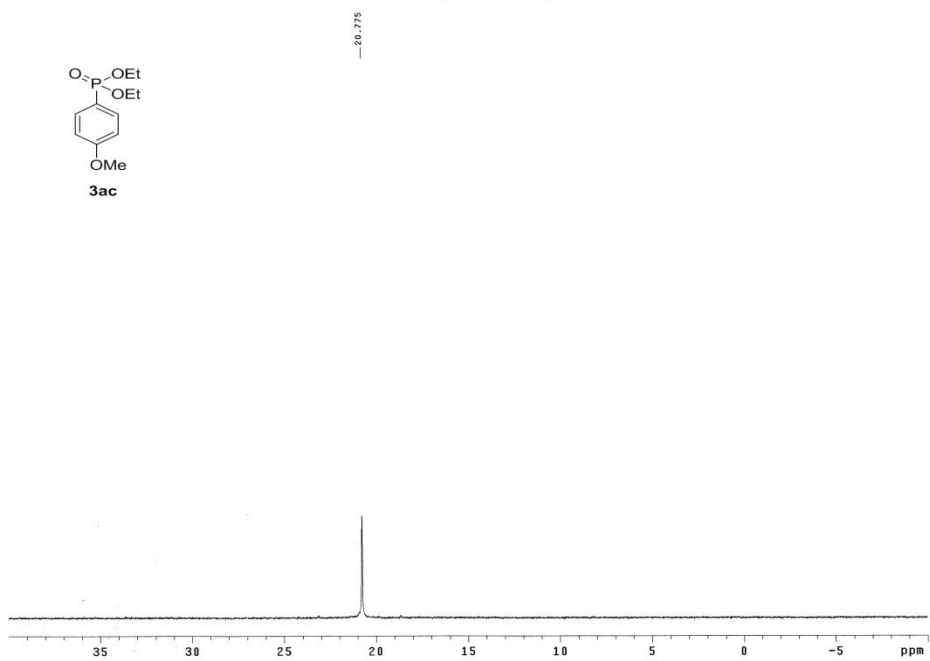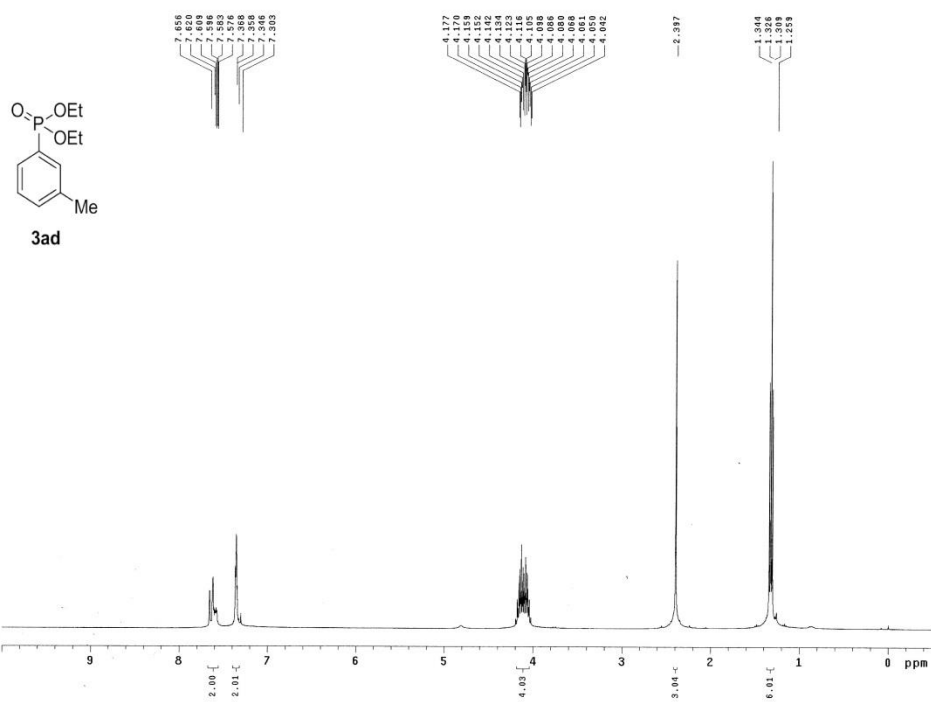

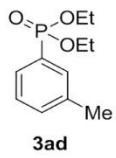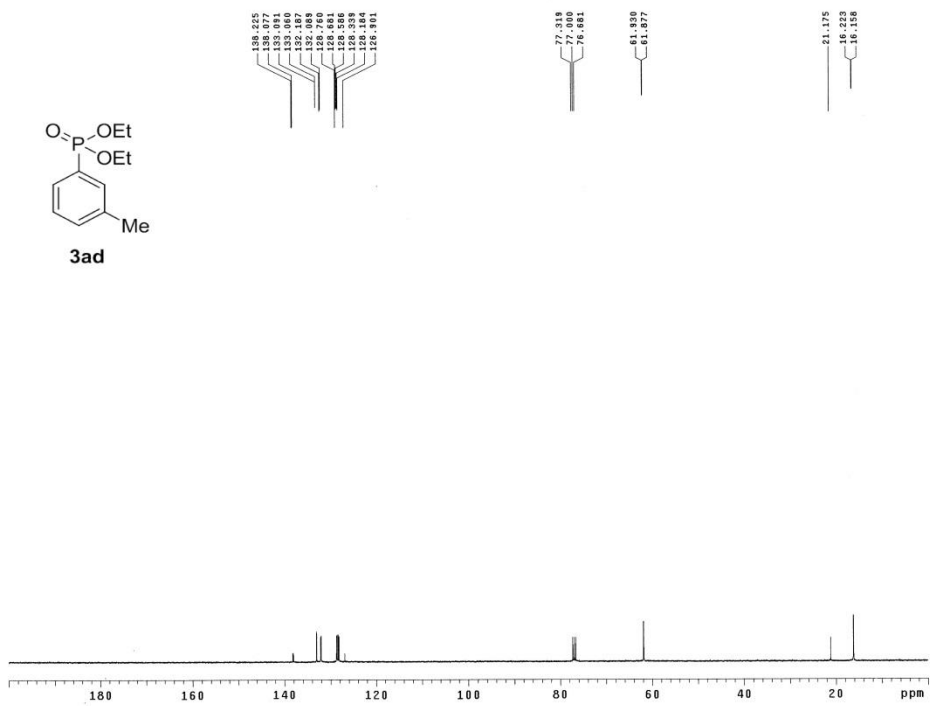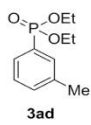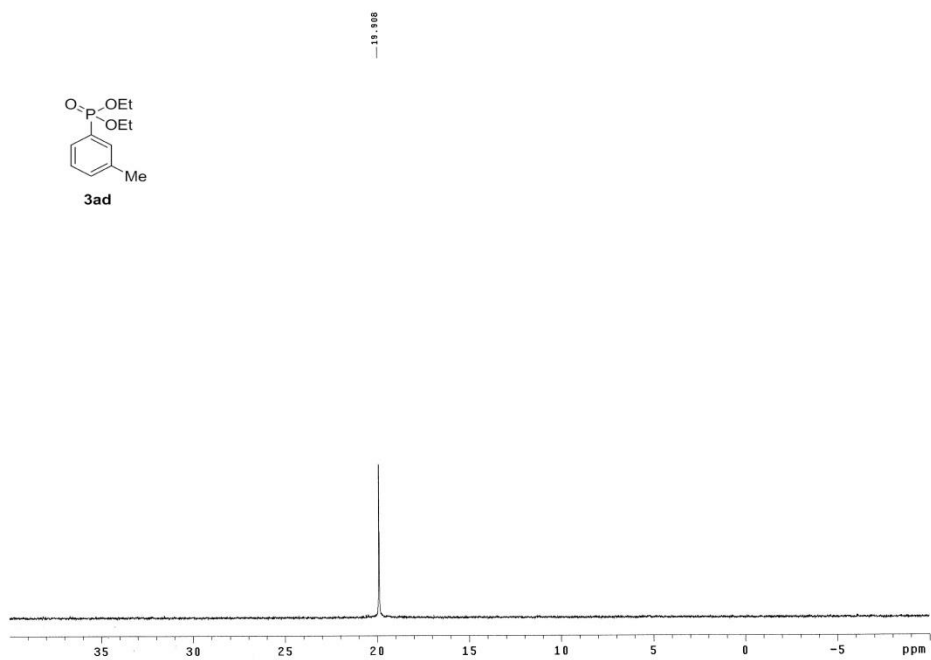



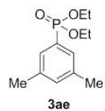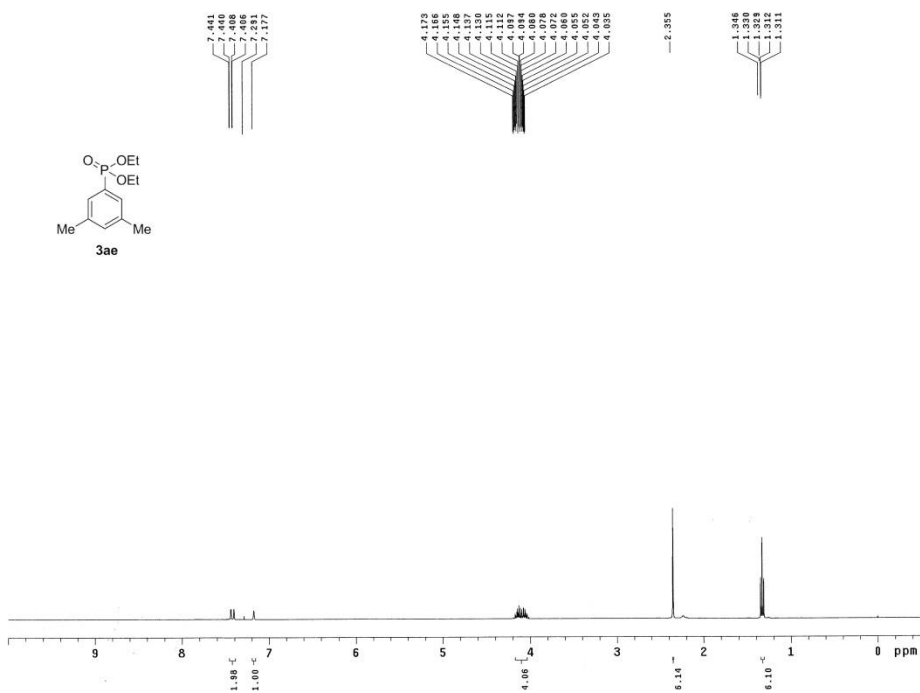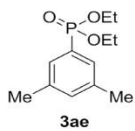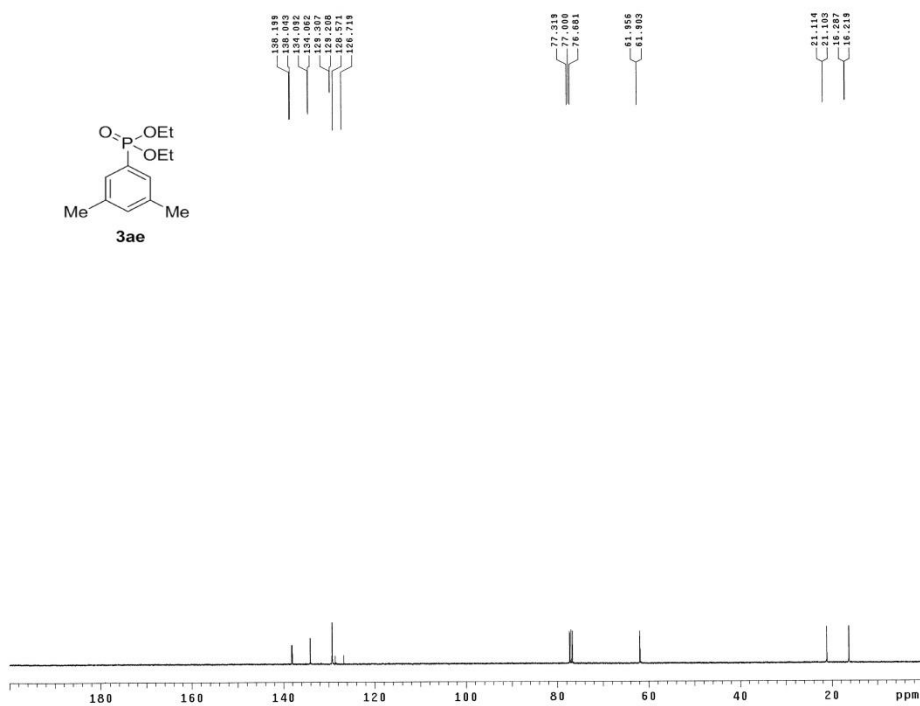

—20.478

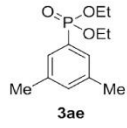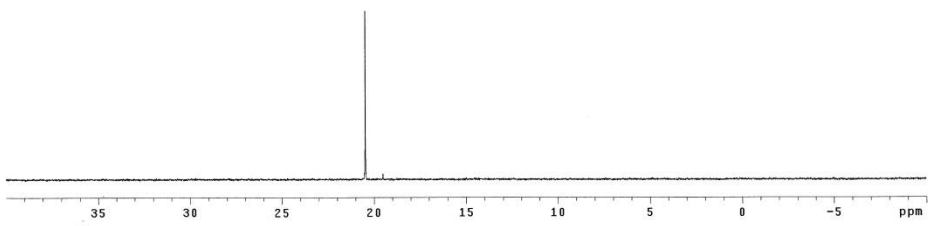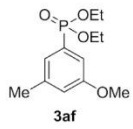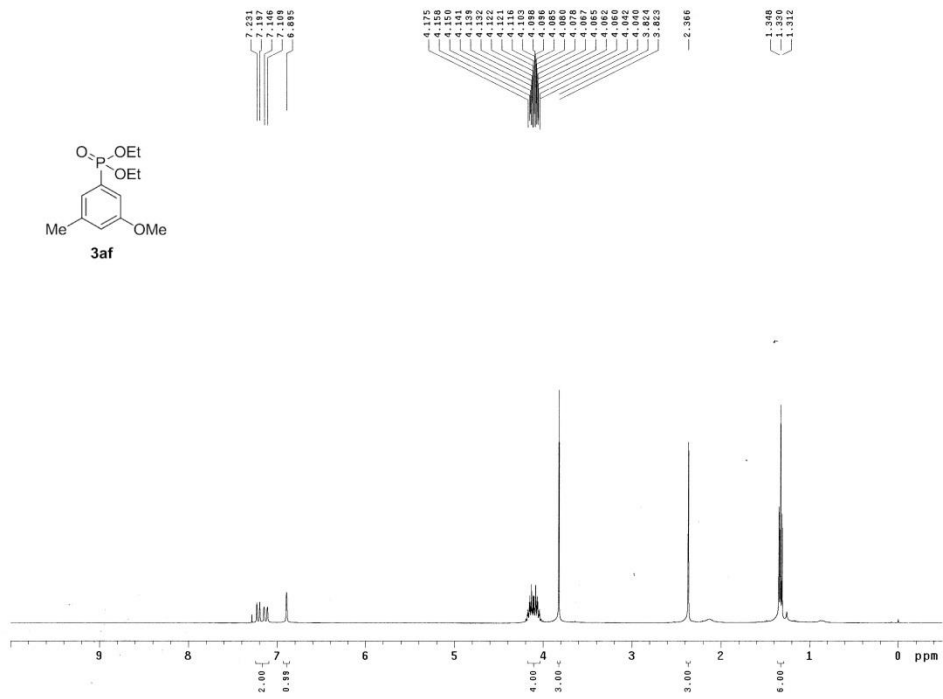

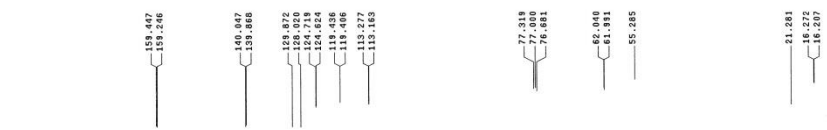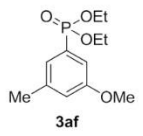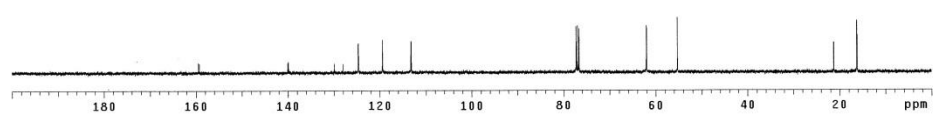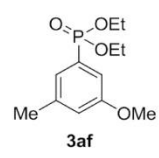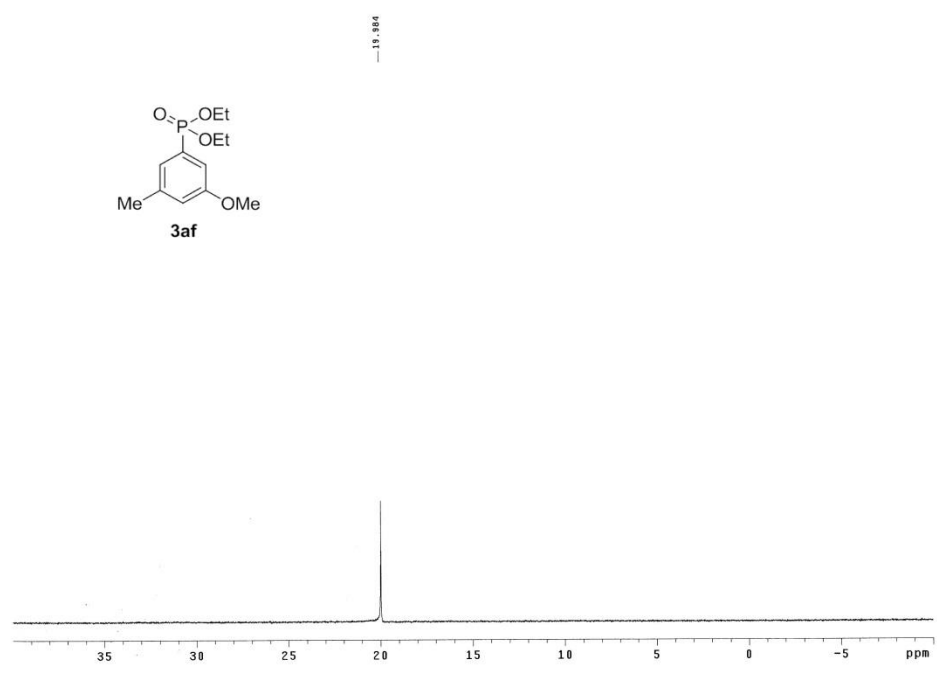

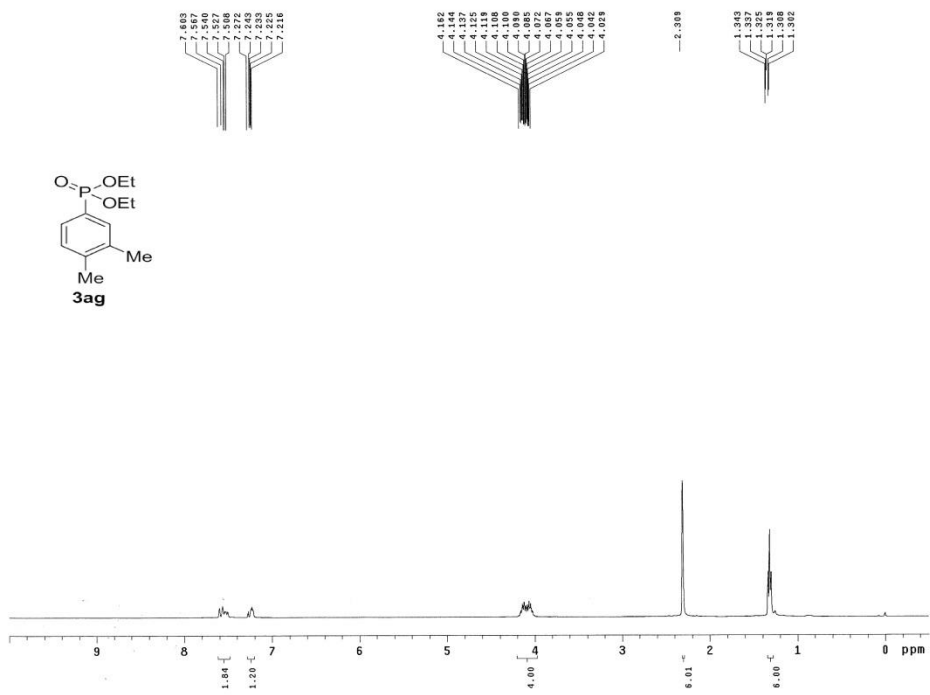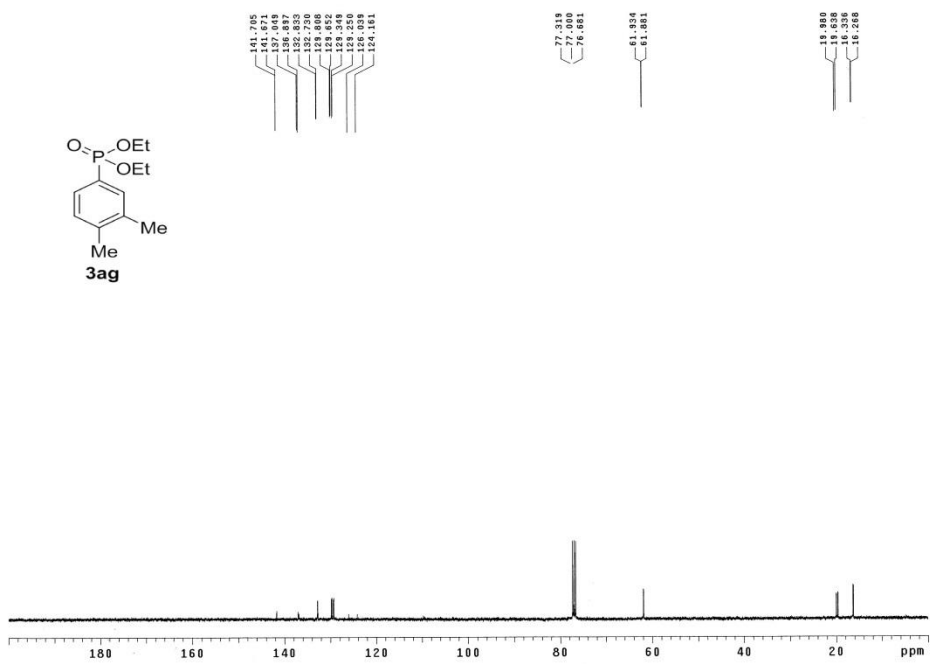

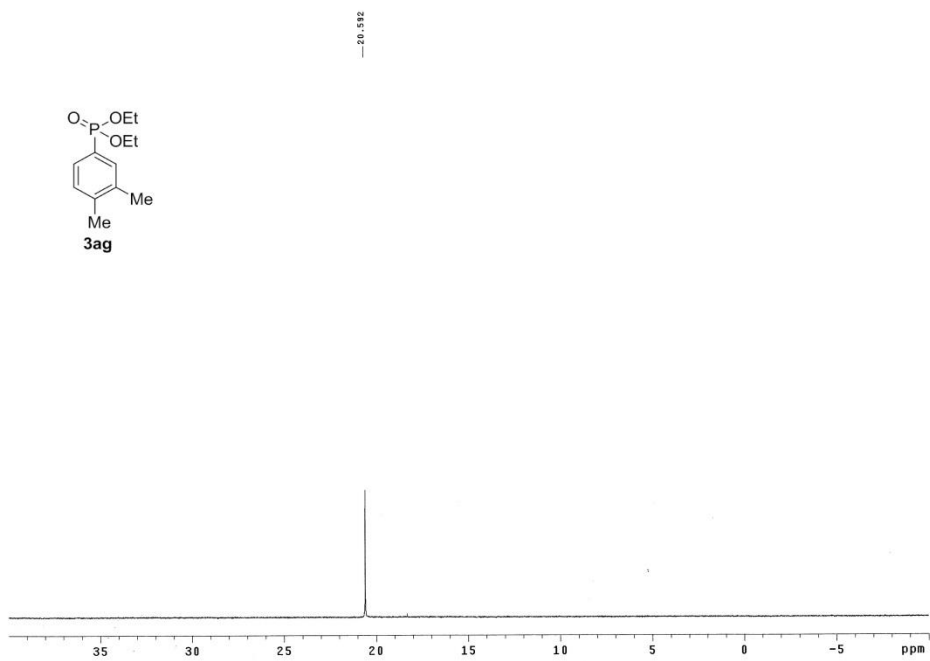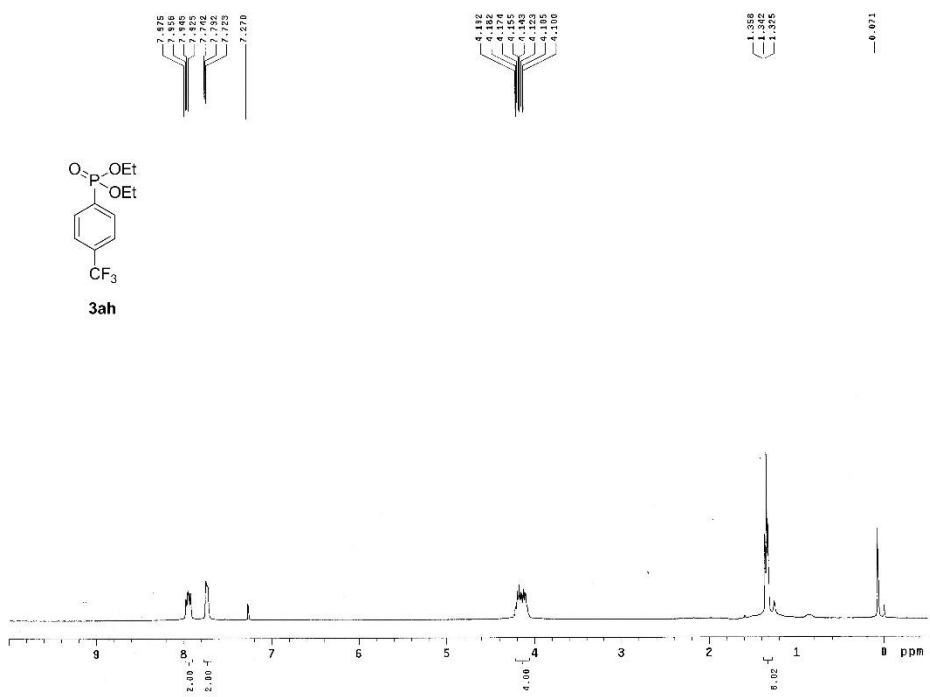

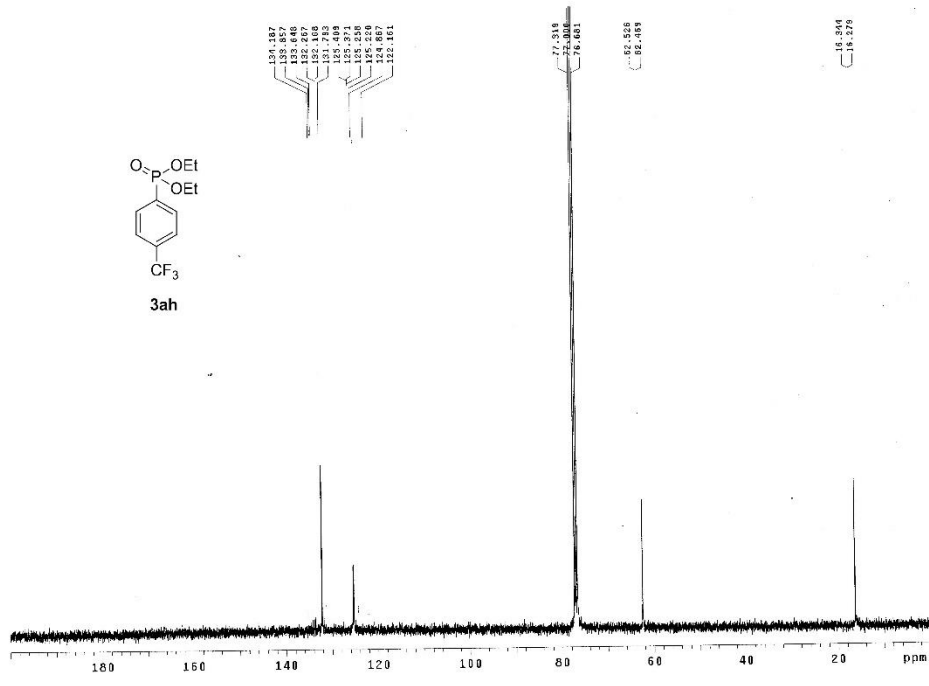

-17.518

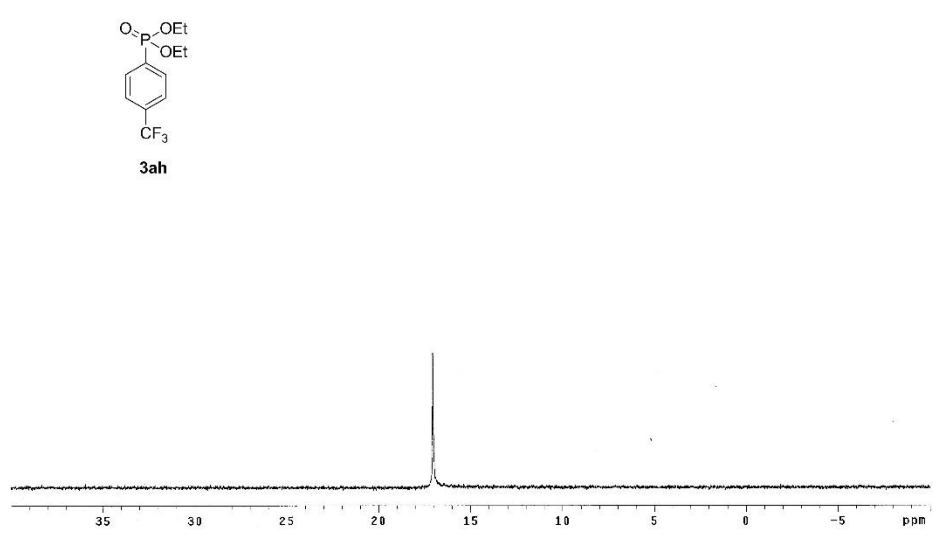

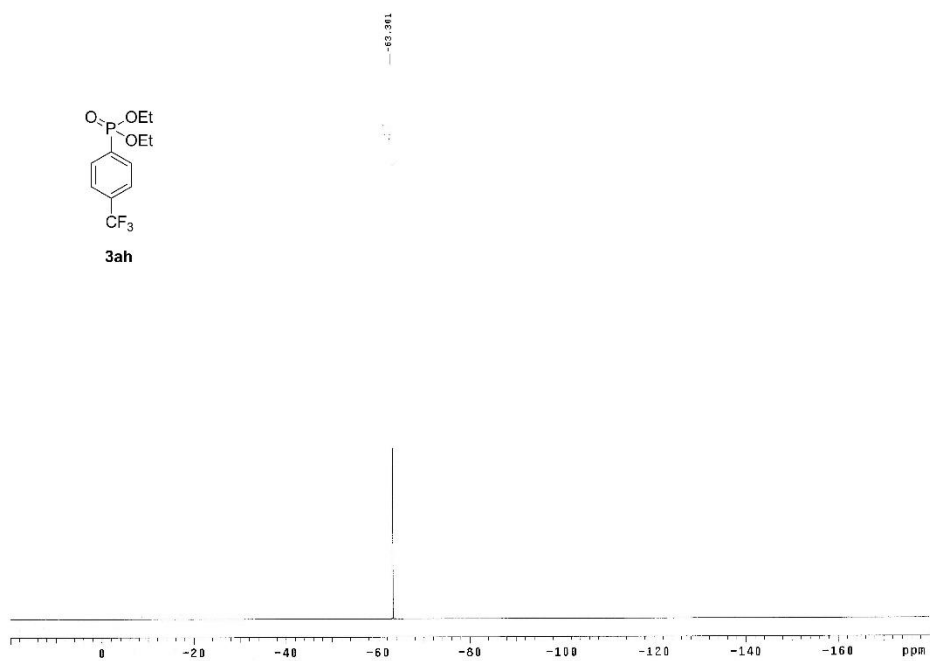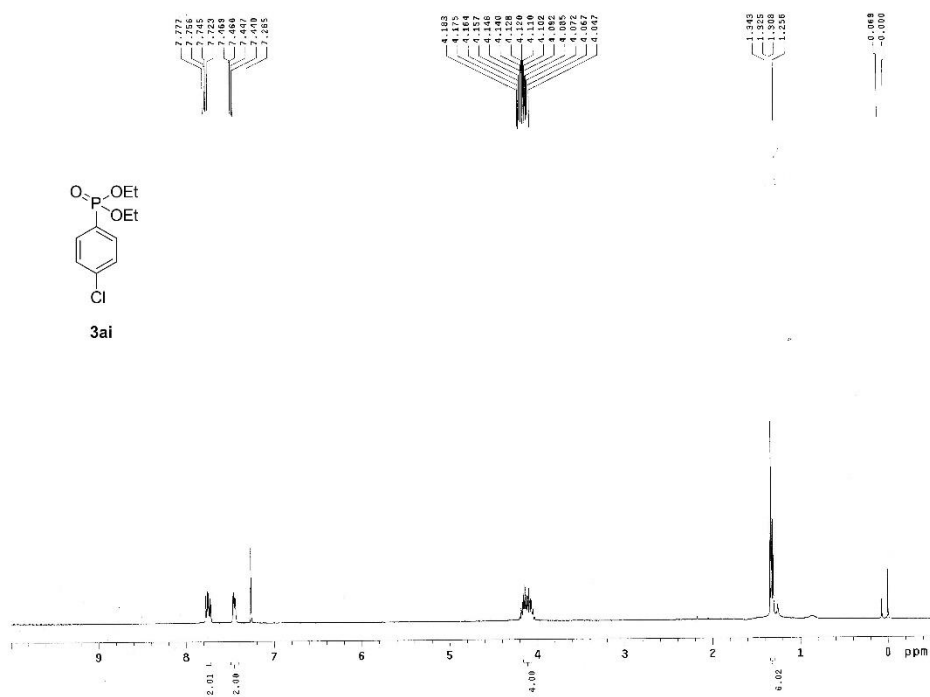

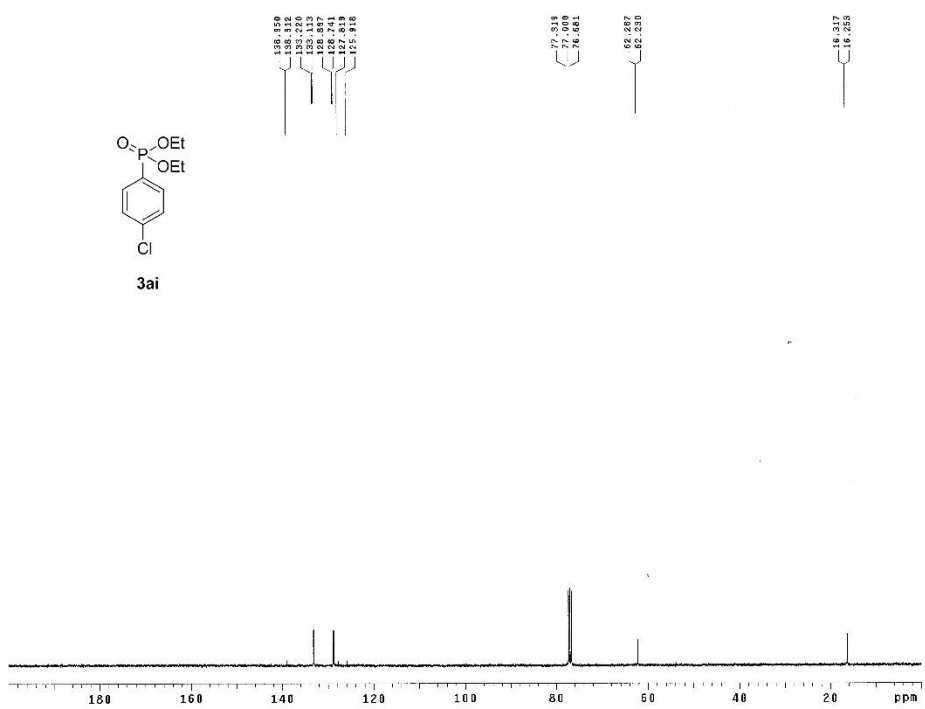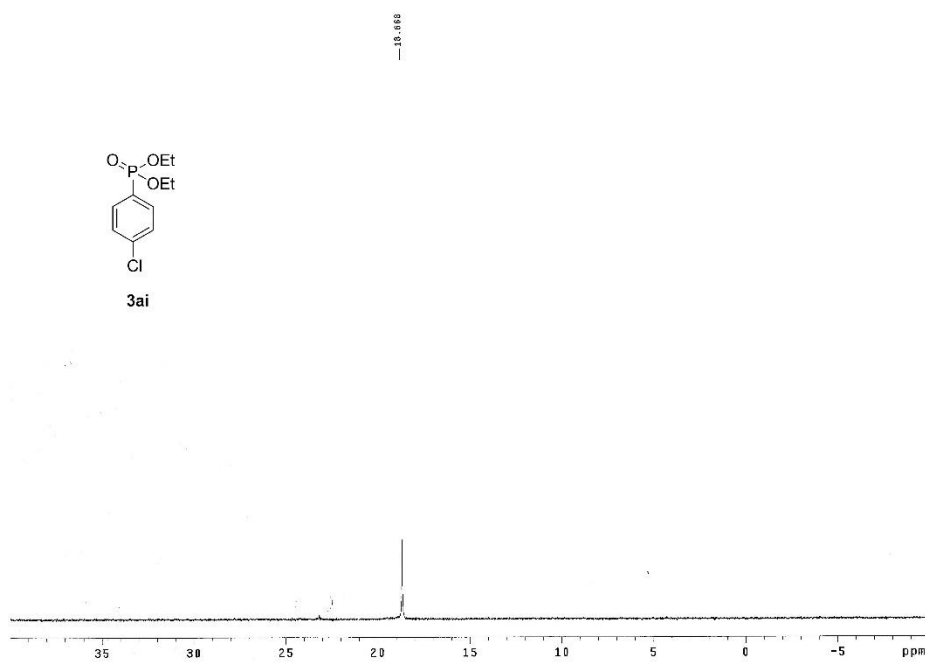



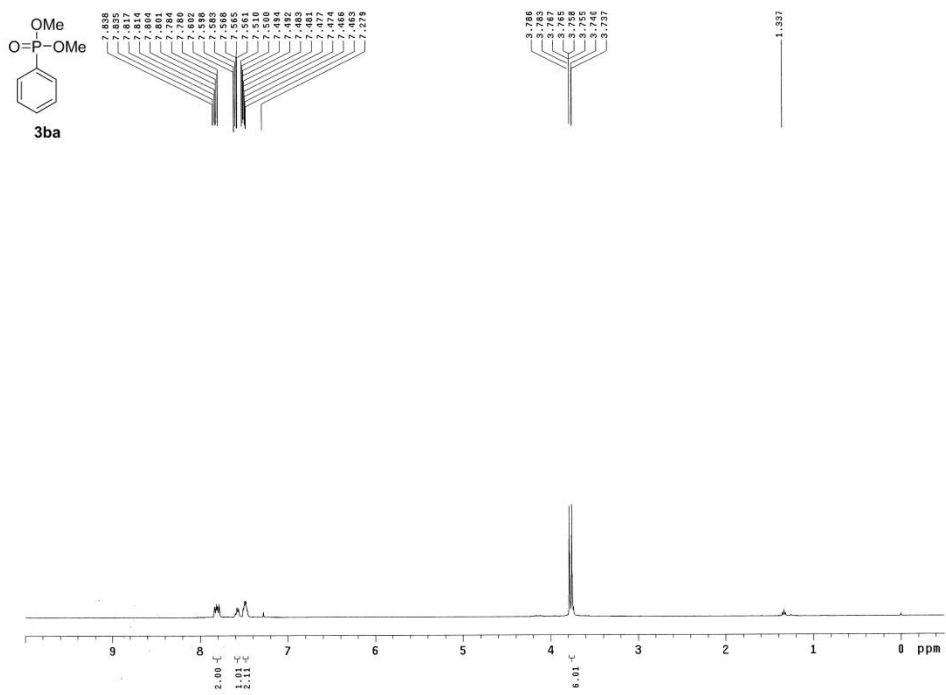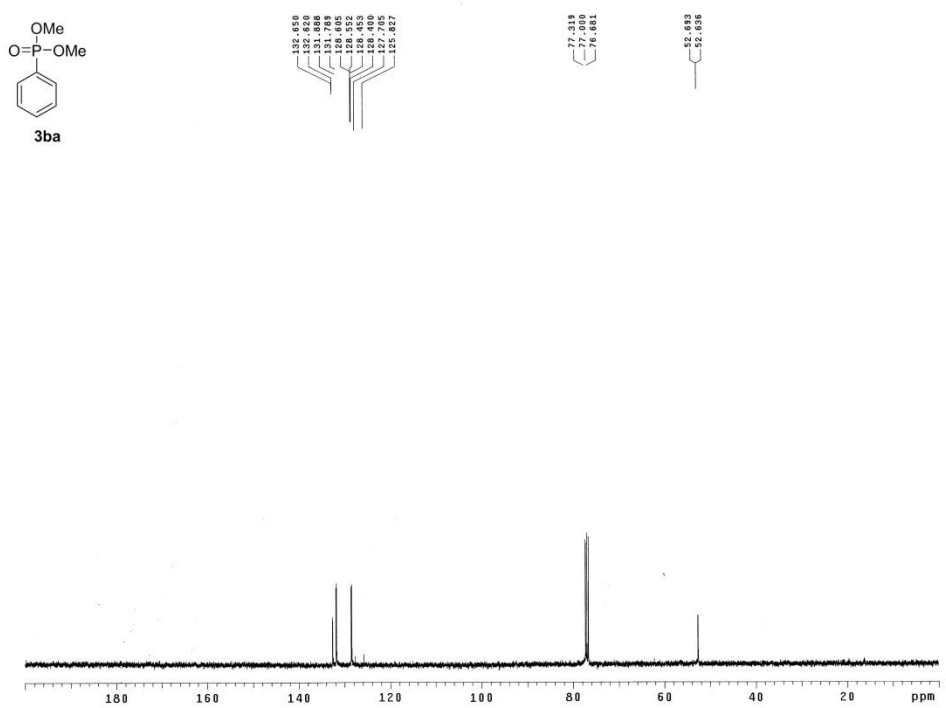

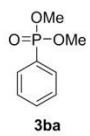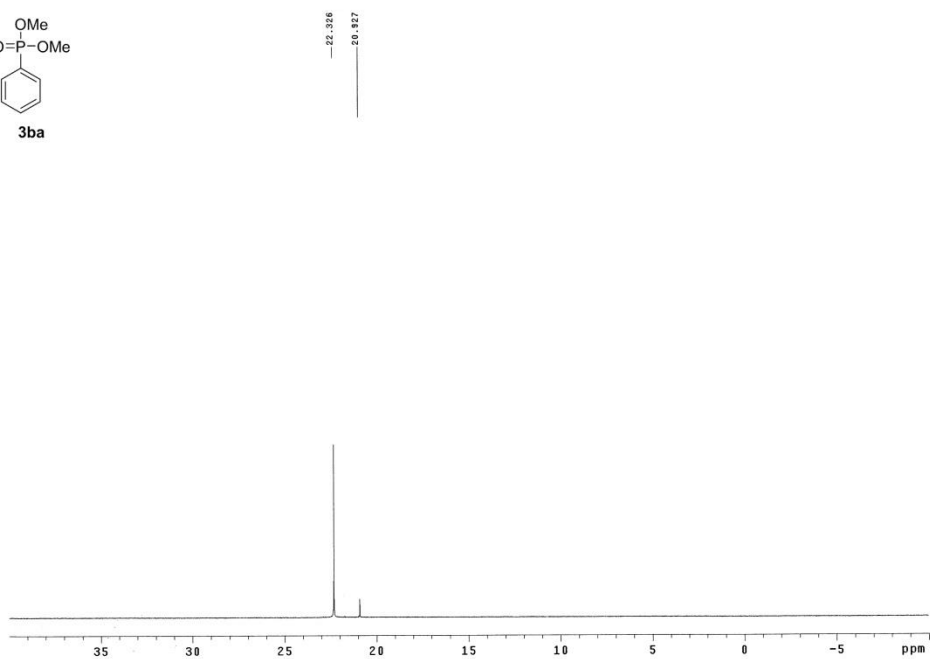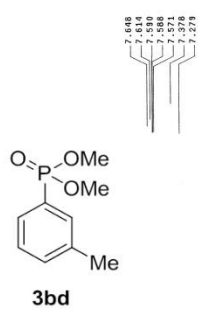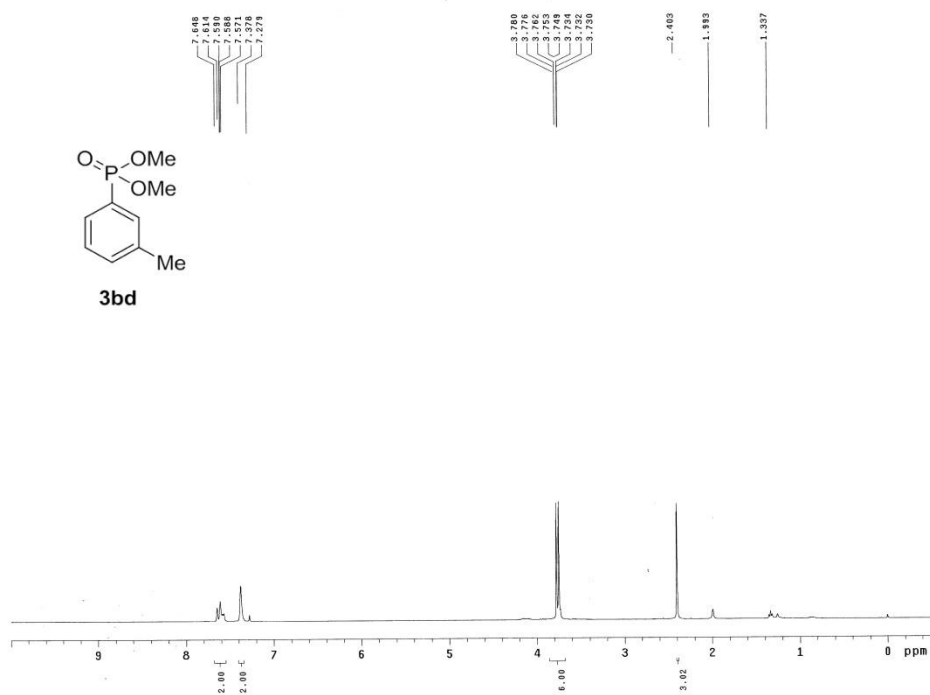

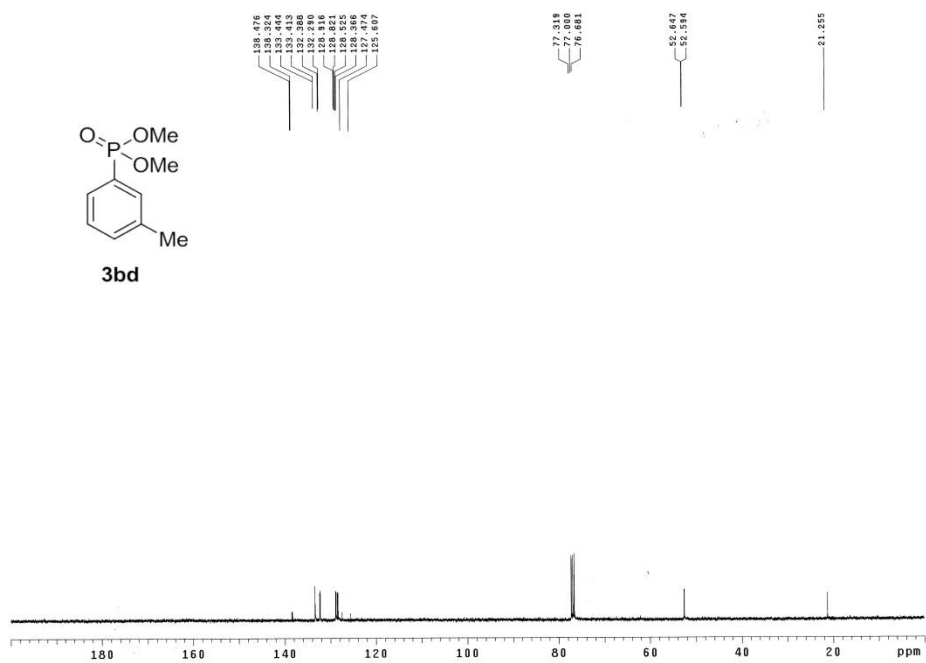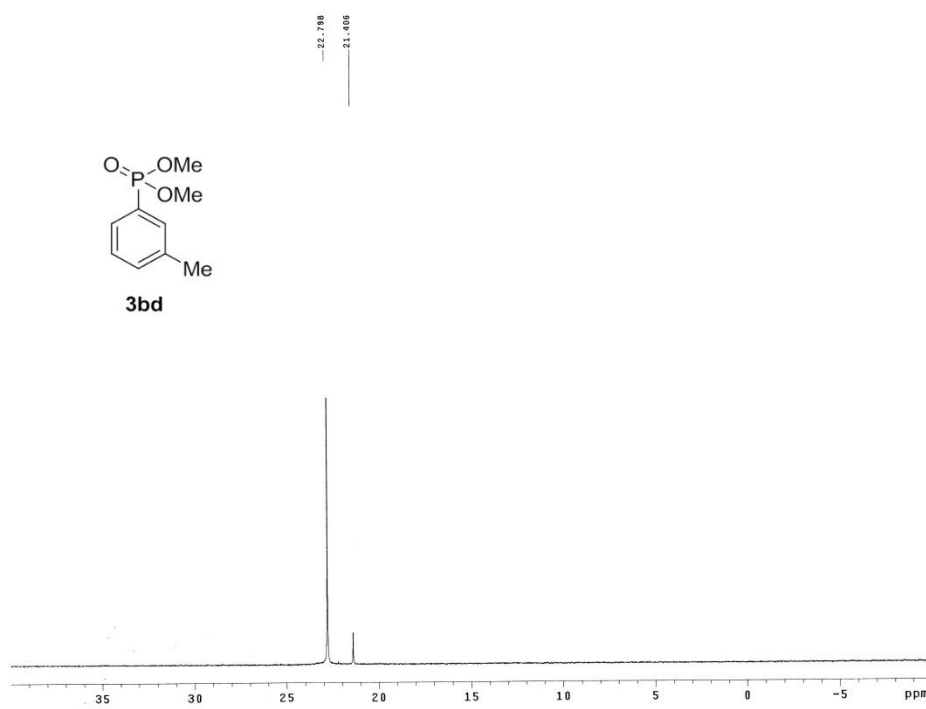

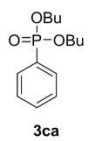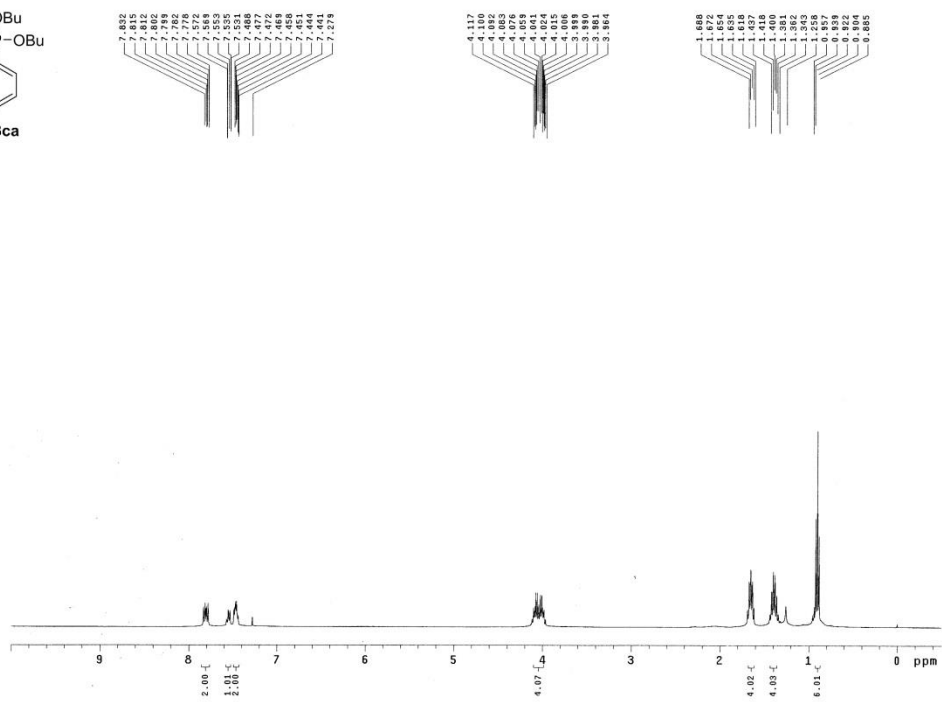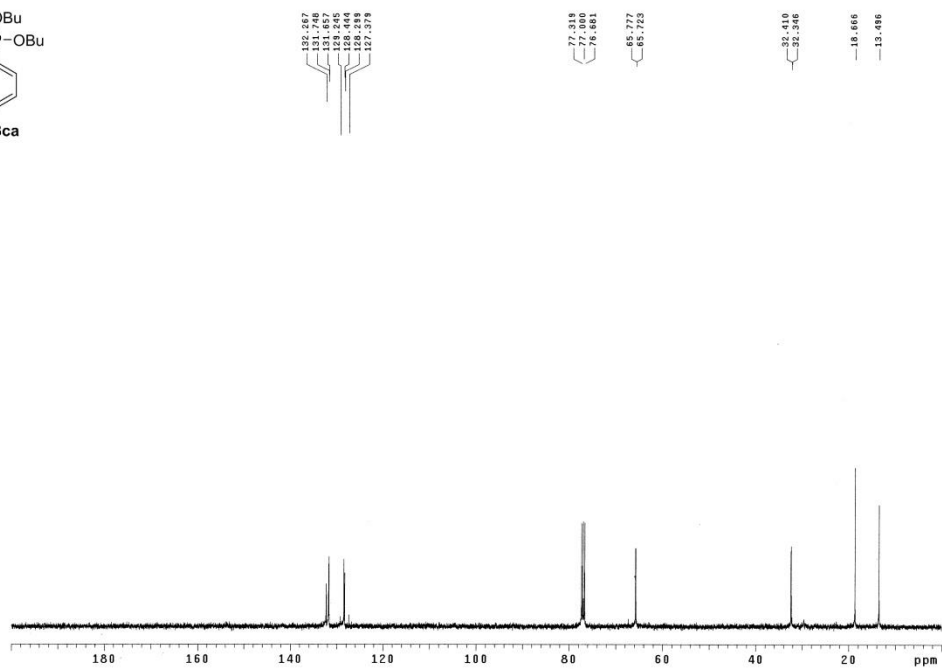

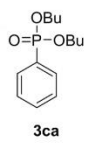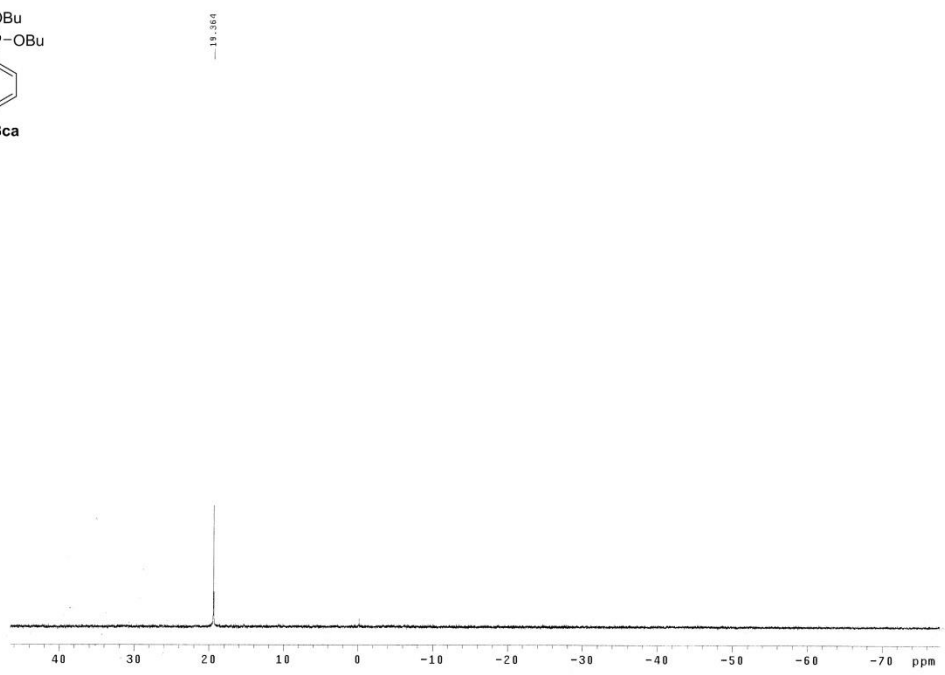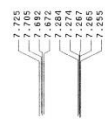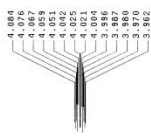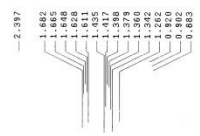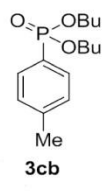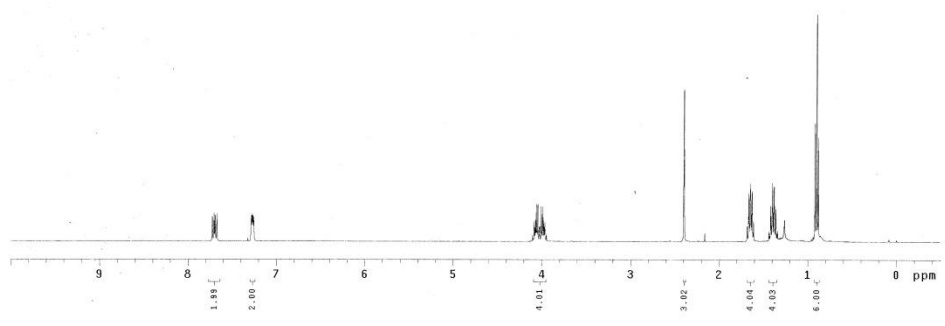

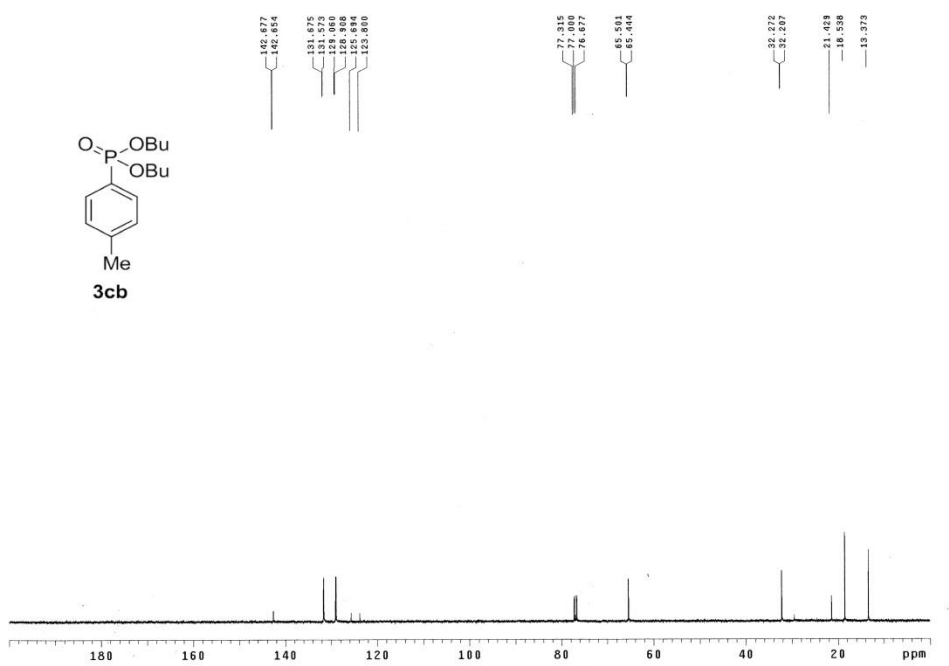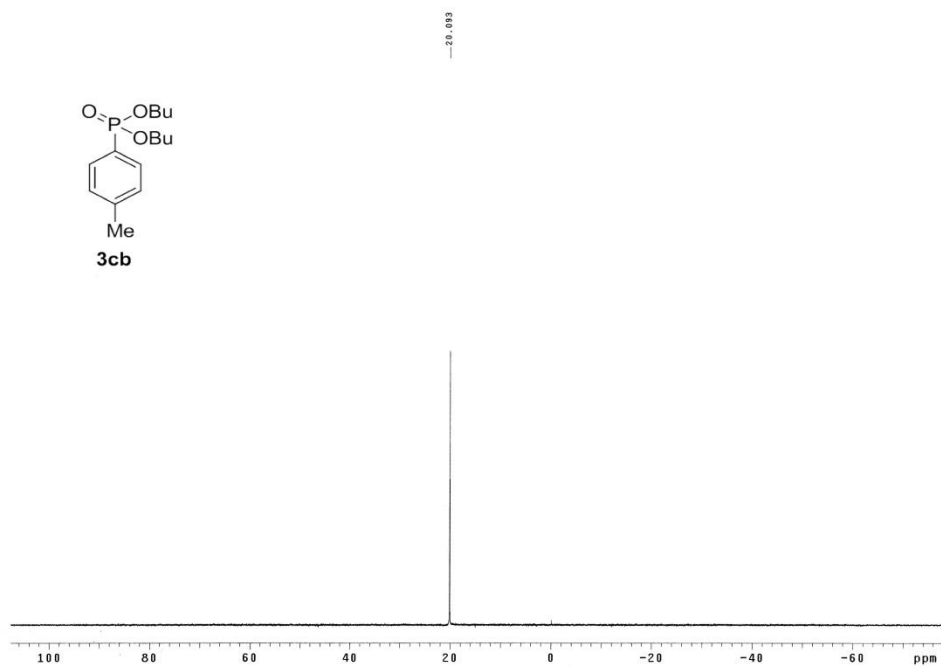

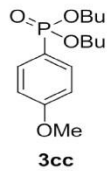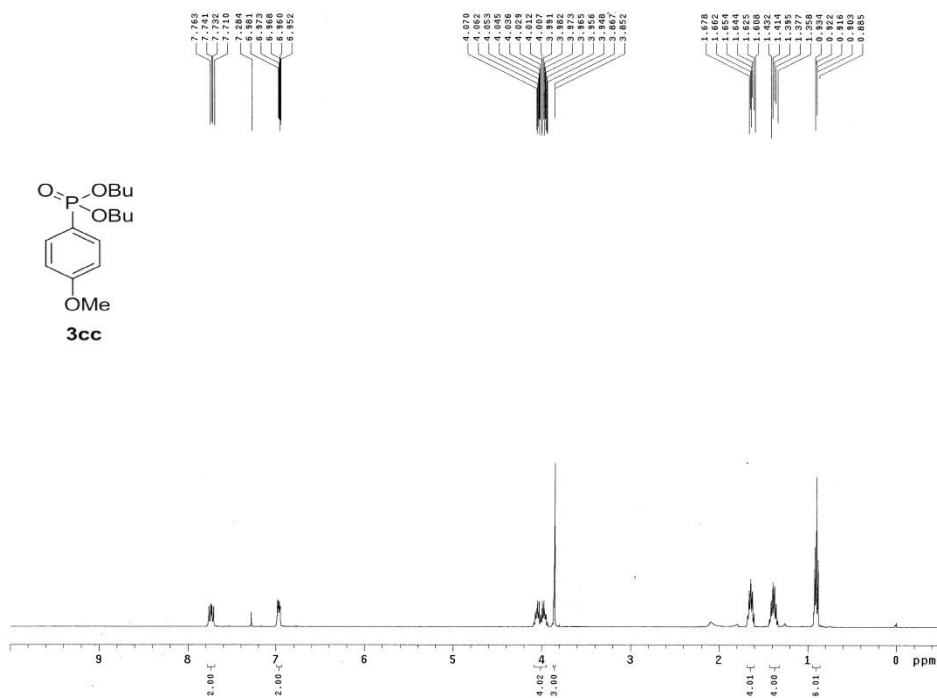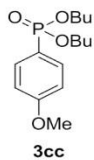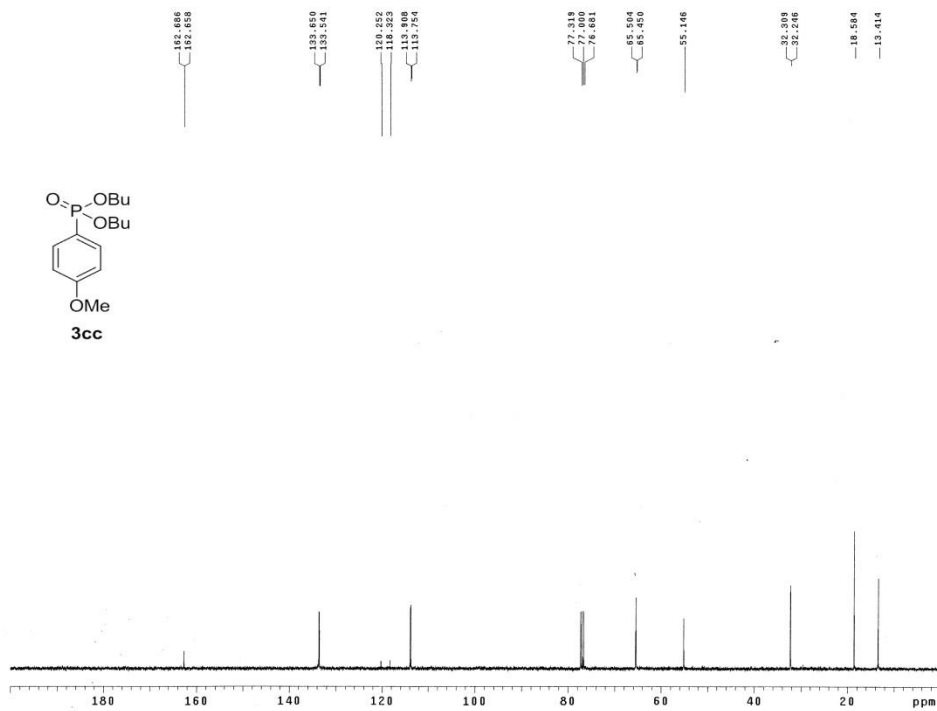

—86.471

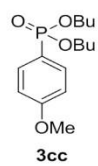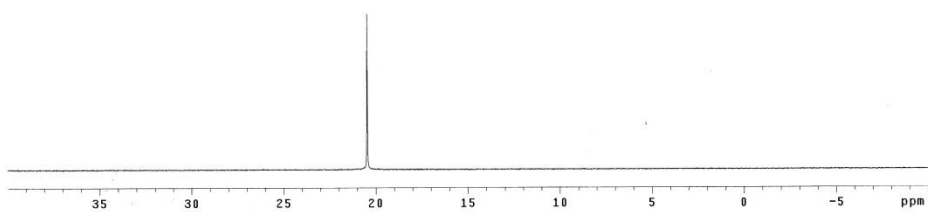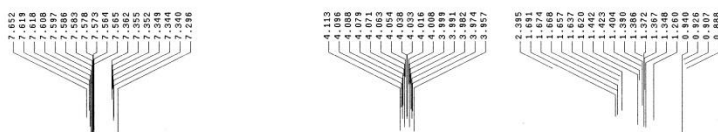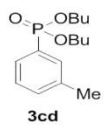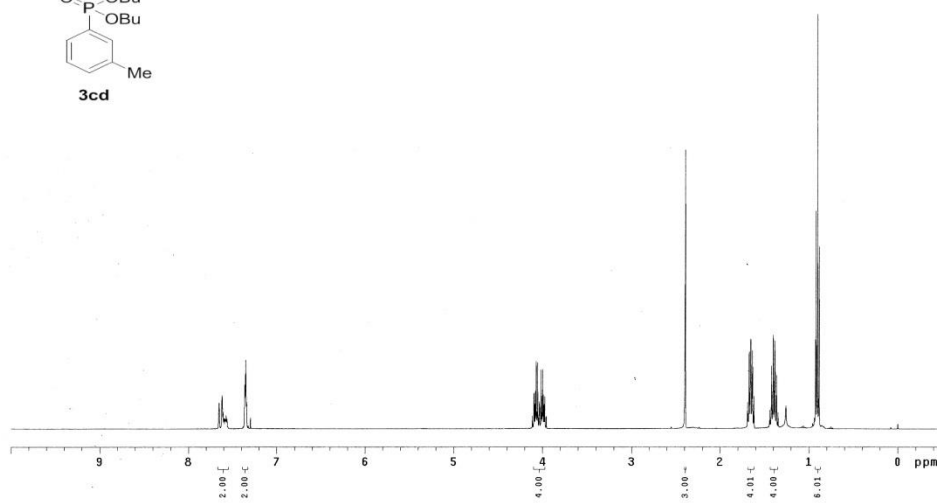



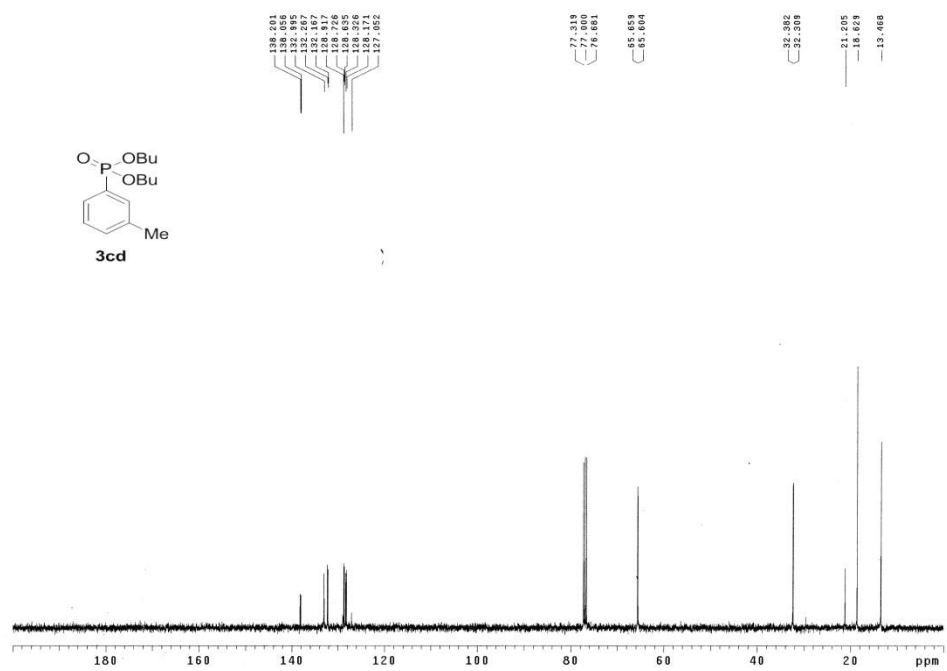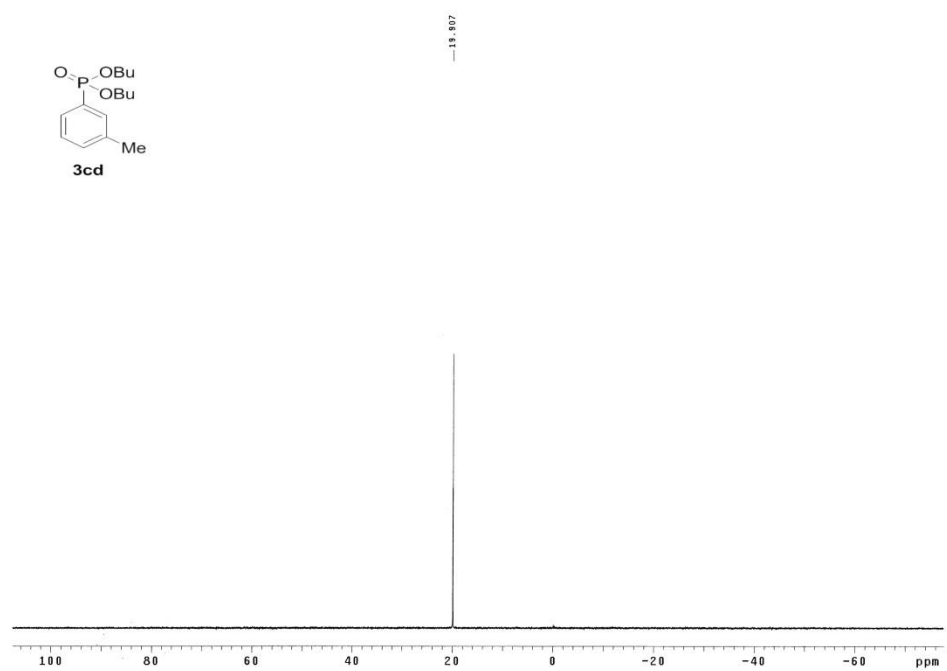

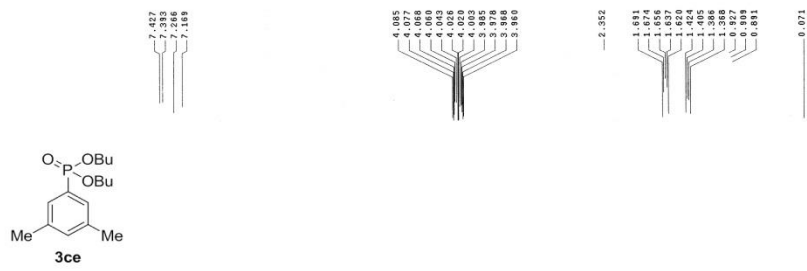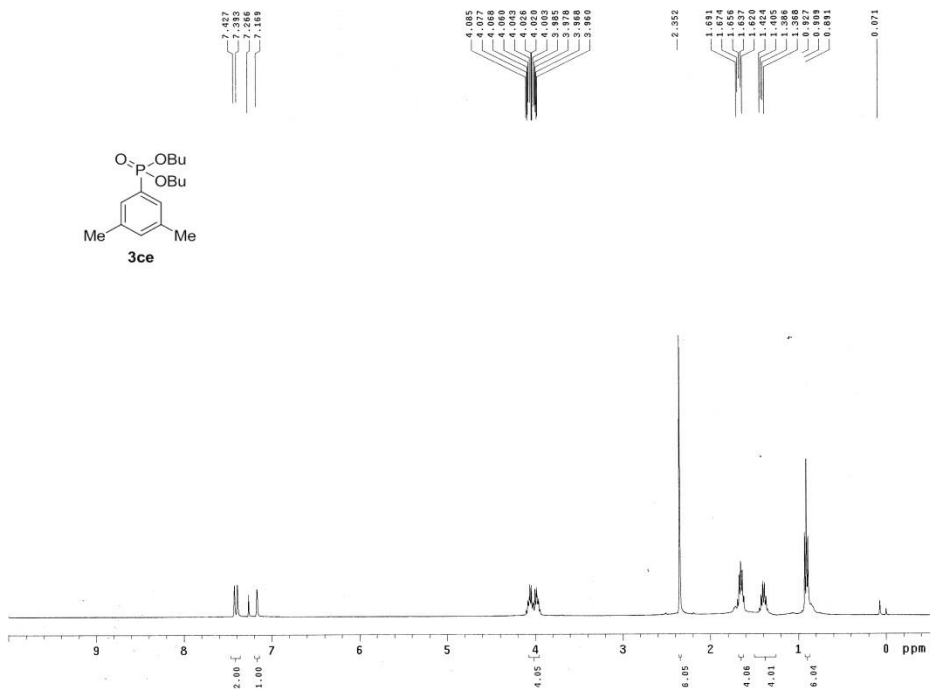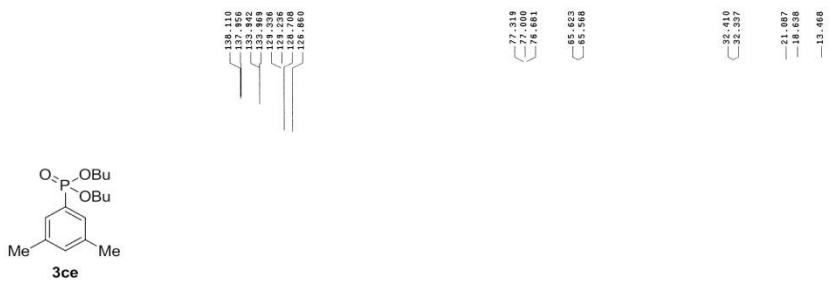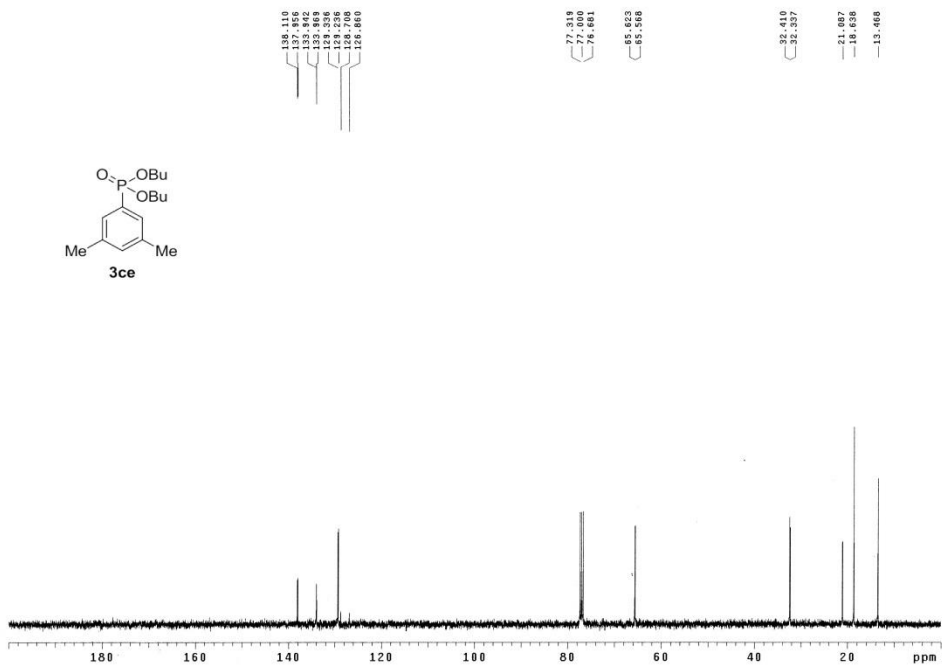

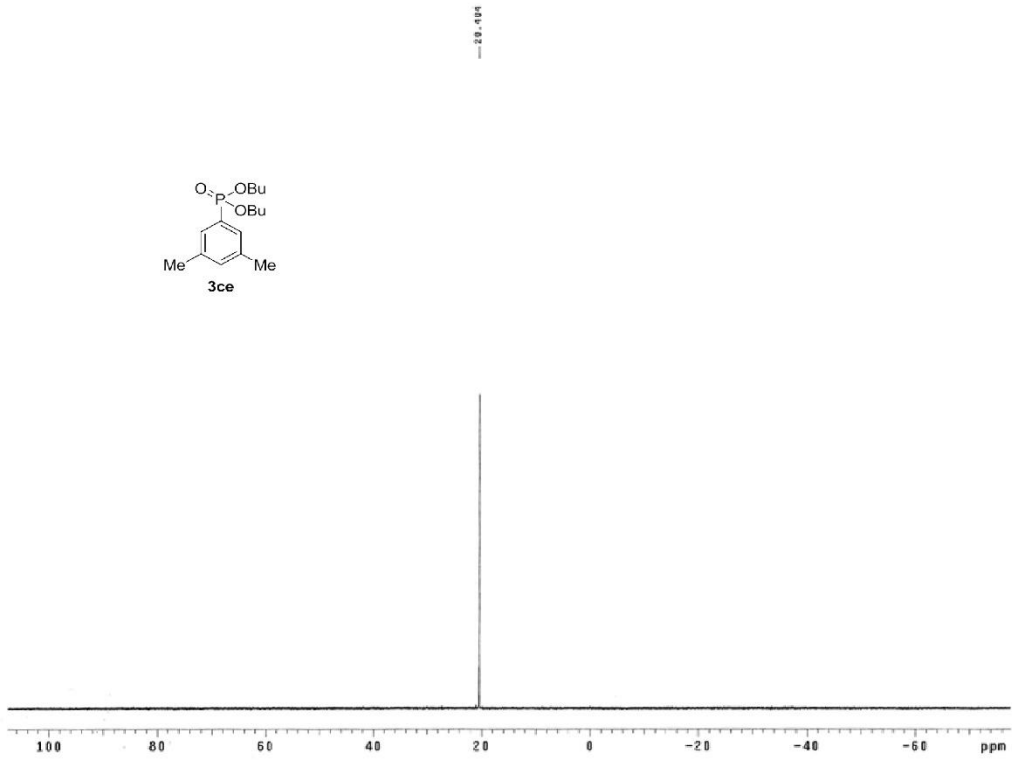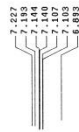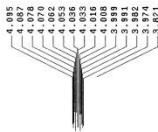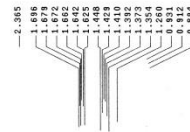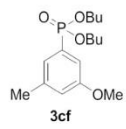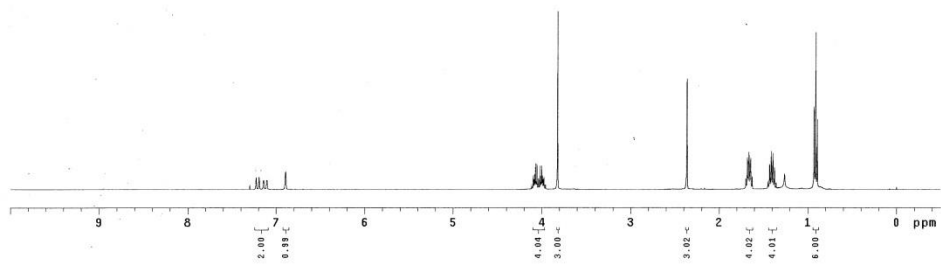

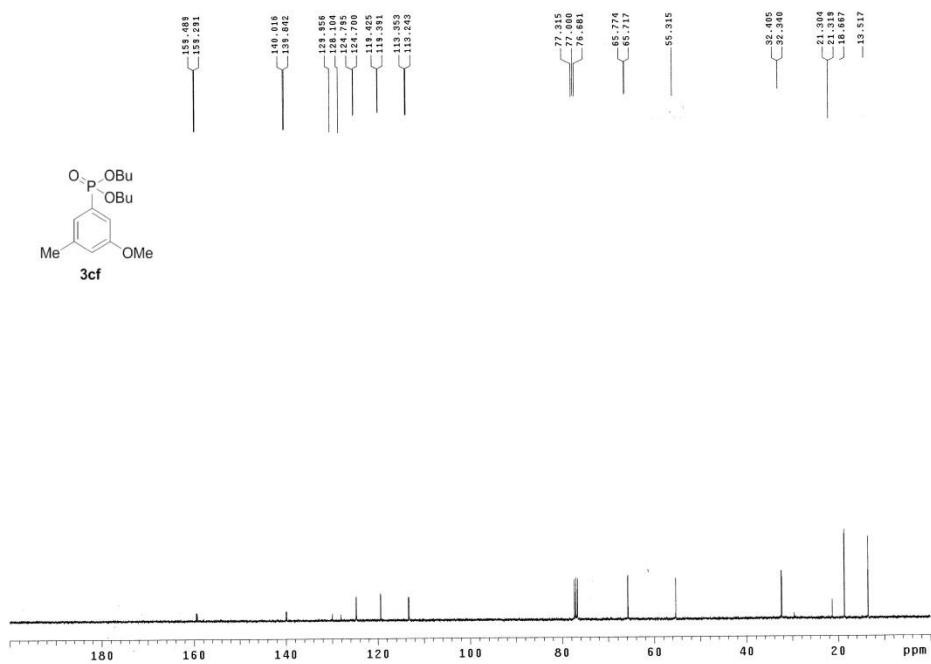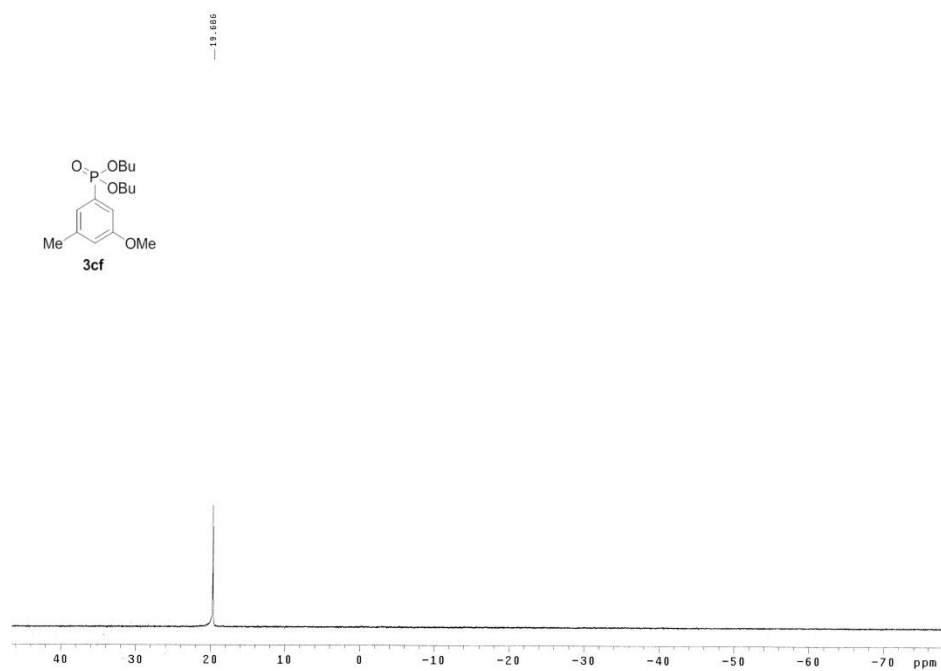

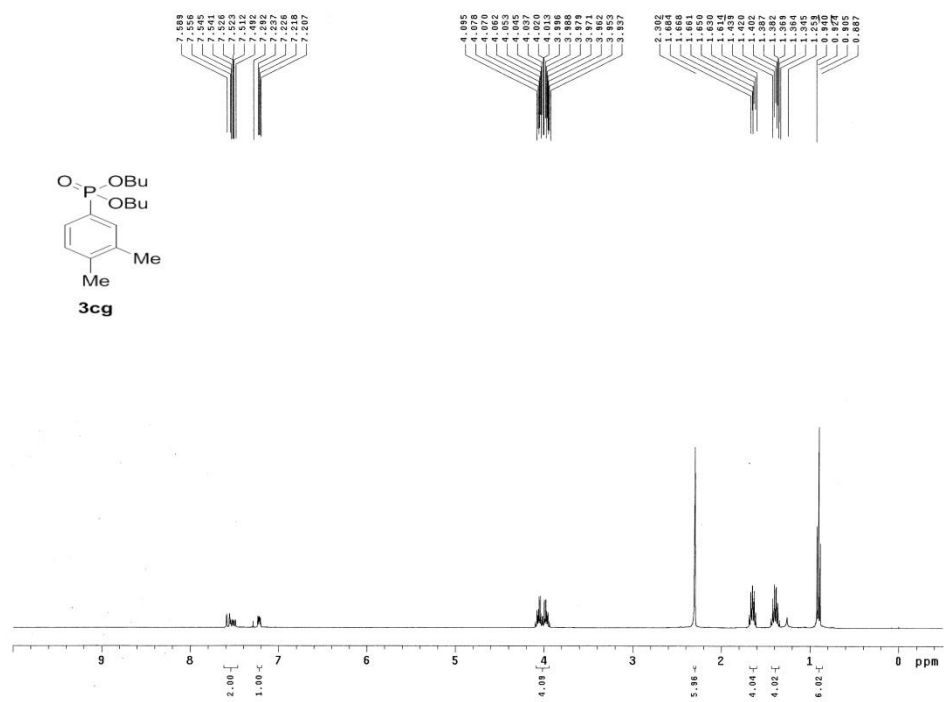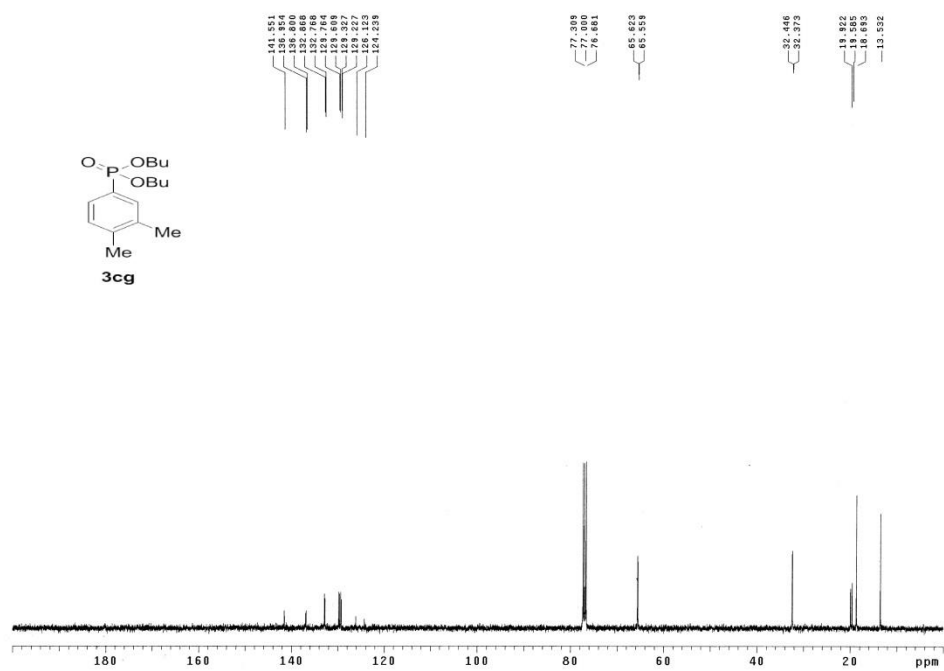

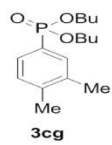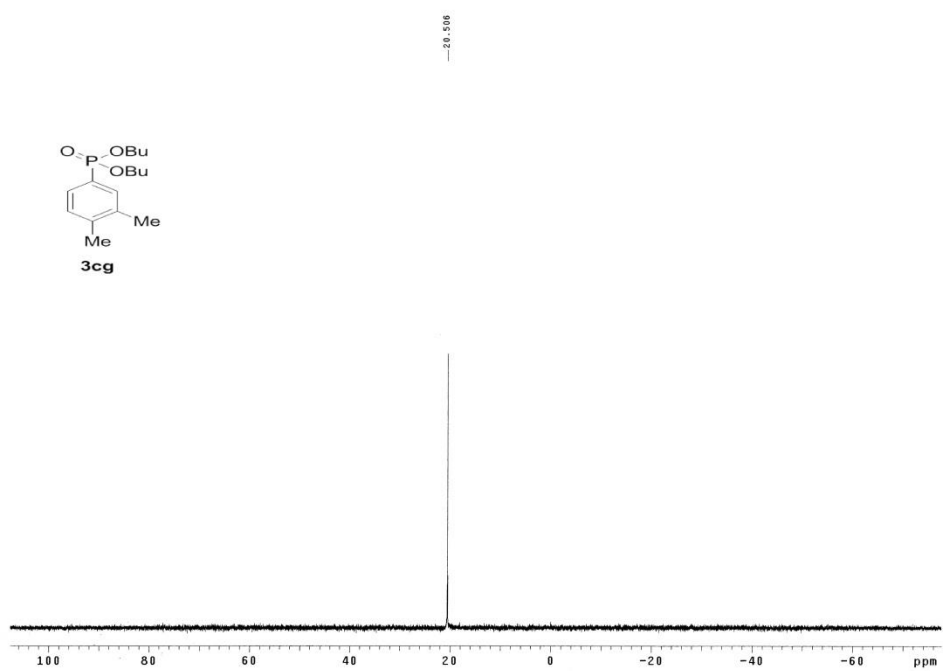

Supplement: c7ra04619g1.pdf [file c7ra04619g1.pdf]
